# Supplementary material
Source: HighWire-hosted journal article supplement (http://bmjopenquality.bmj.com/highwire/filestream/136012/field_highwire_adjunct_files/1/ds6141.pdf)
Supplement: ds6141.pdf [file ds6141.pdf]

# **A multi-faceted approach to improving pain management in the emergency department – *Online supplement***

Ratneswaran C, Dodd K, Krishnanandan S, Enright K, Dasan S

**Table 1 – Key metrics**

| <b>Metric</b>                           | <b>CYCLE 1*</b> | <b>CYCLE 2</b> | <b>CYCLE 3</b> | <b>CYCLE 4</b> |
|-----------------------------------------|-----------------|----------------|----------------|----------------|
| Patients with abdominal pain (24hrs, n) | 32              | 34             | 39             | 37             |
| Included in audit (n)                   | 21              | 23             | 33             | 30             |
| Offered/ received within 20 minutes (%) | 10              | 17             | 3              | 23             |
| Offered/ received within 30 mins (%)    | 10              | 35             | 9              | 27             |
| Offered/ received within 1 hour (%)     | 43              | 57             | 27             | 47             |
| Pain scores recorded total (%)          | 86              | 87             | 72             | 80             |
| Pain scores recorded at triage (%)      | 38              | 83             | 81             | 79             |
| Guideline compliant (%)                 | 29              | 52             | 33             | 57             |
| Re-checked (%)                          | 19              | 22             | 27             | 20             |
| Severe pain relief < 20 mins (%)        | 22              | 40             | 0              | 40             |
| Moderate pain relief < 20 mins (%)      | 0               | 0              | 0              | 29             |
| Mild pain relief < 20 minutes (%)       | 0               | 17             | 13             | 13             |

\*Cycle 1 – November, cycle 2 – December, cycle 3 – January, cycle 4 – February
